# Supplementary material for: Computer-assisted initial diagnosis of rare diseases
Source: PeerJ journal article supplement (doi:10.7717/peerj.2211), 2016-07-21
Supplement: Supporting_Appendix_1.pdf [file Supporting_Appendix_1.pdf]

- 1 Supporting Appendix 1 containing:
- 2 Supporting Methods and Results – Text with supplementary methods and results (pages 3-
- 3 9).
- 4 Supporting Figure 1 – Two examples of RAMEDIS report cards (page 10).
- 5 Supporting Figure 2 – Number of diseases to be considered vs. presence of the correct
- 6 disease in that list for the retrospective study of previously diagnosed rare disease
- 7 patients (page 10).
- 8 Supporting Figure 3 – Estimating the probability that a score  $DS_i \leq k$  might be obtained from
- 9 a random set of symptoms (page 11).
- 10 Supporting Figure 4 – Effect of unreported symptoms on the maximum  $DS_i$  scores for
- 11 patients (page 11).
- 12 Supporting Figure 5 – Effect of the evolution in the ORPHANET dataset on the F1-Score of
- 13 RDD (page 12).
- 14 Supporting Figure 6 – Effect of the evolution in the ORPHANET dataset on the effect of
- 15 unreported symptoms on the maximum  $DS_i$  scores for patients (page 13).
- 16 Supporting Table 1 – Symptoms used to perform the experiments summarized in Tables 1
- 17 and 2 (page 15).
- 18
- 19 Supporting Table 2 – Estimating the probability that a difference between scores
- 20  $\Delta DS_i < x$  is significant at three p-value levels, when a varying number of symptoms is
- 21 submitted to RDD (page 16).
- 22
- 23
- 24
- 25

# Supporting Appendix 1: Additional Methods and Results for Computer- Assisted Initial Diagnosis of Rare Diseases

---

Rui Alves<sup>1,\*§</sup>, Marc Piñol, <sup>2,\*</sup>, Jordi Vilaplana<sup>2</sup>, Ivan Teixido<sup>2</sup>, Joaquim Cruz<sup>1</sup>, Jorge Comas<sup>1</sup>, Ester Vilaprinyo<sup>1</sup>, Albert Sorribas<sup>1</sup>, Francesc Solsona<sup>2,§</sup>,

<sup>1</sup>Departament d'Informàtica i Enginyeria Industrial, Universitat de Lleida, Av. Jaume II nº 69, 25001 Lleida, Spain.

<sup>2</sup>Departament de Ciències Mèdiques Bàsiques & IRBLleida, Universitat de Lleida, Montserrat Roig nº 2, 25008 Lleida, Spain.

e-mails: [wrrzag666@gmail.com](mailto:wrrzag666@gmail.com)  
[jordi@diei.udl.cat](mailto:jordi@diei.udl.cat)  
[iteixido@diei.udl.cat](mailto:iteixido@diei.udl.cat)  
[joaquimcruz92@gmail.com](mailto:joaquimcruz92@gmail.com)  
[jorgecomasp@gmail.com](mailto:jorgecomasp@gmail.com)  
[evilaprinyo@cmb.udl.cat](mailto:evilaprinyo@cmb.udl.cat)  
[albert.sorribas@cmb.udl.cat](mailto:albert.sorribas@cmb.udl.cat)  
[francesc@diei.udl.cat](mailto:francesc@diei.udl.cat)  
[ralves@cmb.udl.cat](mailto:ralves@cmb.udl.cat)

\*These two authors contribute equally for the study

<sup>§</sup>Corresponding authors:

Francesc Solsona: Departament d'Informàtica i Enginyeria Industrial, Universitat de Lleida, Av. Jaume II nº 69,

25001 Lleida, Spain.

email: [francesc@diei.udl.cat](mailto:francesc@diei.udl.cat)

tel: 00 34 973 70 27 35

fax: 00 34 973 70 27 02

Rui Alves: Departament de Ciències Mèdiques Bàsiques & IRBLleida, Universitat de Lleida, Edifici de Recerca Biomèdica I, Av. Rovira Roure 80, 25198 Lleida, Spain.

email: [ralves@cmb.udl.cat](mailto:ralves@cmb.udl.cat)

tel: 00 34 973 70 24 25

fax: 00 34 973 70 24 26

## 65 **TECHNOLOGY UNDERLYING THE RARE DISEASE DISCOVERY PROTOTYPE**

66 The technology behind the web application is the Grails framework, a web application  
67 framework built for the Java Virtual Machine that uses the Groovy programming language. Grails  
68 uses a MVC (Model View Controller) pattern that allows for a full integration between the model  
69 (and the database) and the view (user interface). With built-in database access and modeling, it  
70 enables easy abstraction and decoupling between these two parts of the application, permitting  
71 easy database migrations. This also helps hiding database complexity and access to information in  
72 an object-oriented way. JQuery and Ajax were also used in order to provide dynamic web  
73 capabilities like autocomplete. A powerful front-end framework for faster and easier web  
74 development (Twitter Bootstrap) was included, streamlining the styling and design of the web  
75 interface. Built for the JVM, this framework also enables easy integration with Java packages,  
76 plugins and wrappers.

77 The database design provides a welcome positive side-effect: it is trivial to keep the database up-  
78 to-date. A periodic download of the Orphanet data every three months, followed by upload of  
79 that data to our database can be done in minutes, facilitating that RDD is kept up to date and  
80 usable over the long run. Currently, the database has a total of 6 915 diseases and 2 110  
81 symptoms. There is a total of 101 840 records representing relations between symptoms and  
82 diseases.

83 We note that the symptoms-disease association file from the Orphanet dataset are re-curated by  
84 us in order to ensure that the automated processing of the xml file made available by Orphanet  
85 is done without mistakes. Although it does not always happen, in some versions of the xml files we  
86 downloaded had one or more tags that were not properly closed. In addition, in the earlier  
87 versions of the files, the symptoms had not yet been fully converted to their synonymous terms in

88 the HPO (Human Phenotype Ontology)<sup>1</sup>. We performed a script analysis to identify those terms  
89 that were not in HPO and transformed them into their HPO synonyms. In the last 3 versions of the  
90 ORPHANET xml file, we found that HPO nomenclature has been fully implemented.

91

## 92 **CHOOSING THE APPROPRIATE PREDICTION METHODS**

93 Other classification approaches to predicting rare diseases based on symptoms were tested. First,  
94 we tested an additional ranking function that takes into consideration how frequently each  
95 symptom is thought to be associated with the disease. This information is provided in the  
96 ORPHANET dataset, which associates qualitative frequency information to a symptom, when it is  
97 associated to a disease (Very Frequent, Frequent, and Occasional). This tested function as the  
98 form:

$$99 \quad DS'_i = 1 - \frac{\sum_{j=1}^n \delta_j}{Max[S_{user}, S_{Disease\ i}]} \quad \text{Eq. A1}$$

100 In Eq. A1  $S_{user}$  represents the number of symptoms provided by the user,  $S_{Disease\ i}$  represents the  
101 number of symptoms of disease  $i$  stored in the database, and  $Max[S_{user}, S_{Disease\ i}]$  represents the  
102 largest number between  $S_{user}$  and  $S_{Disease\ i}$ .  $n$  represents the number of symptoms that are different  
103 between the set submitted by the user and the set associated to any given rare disease in the  
104 database.  $\delta_j$  measures the qualitative frequency at which symptom  $j$  has been found to associate  
105 to disease  $i$  in the past (see above). Given that there were only three categorical frequency  
106 associations (Very Frequent, Frequent, Occasional),  $\delta_j$  was considered to have one of three values.  
107  $\delta_j = 1$  if the symptom is either very frequently associated to the disease  $i$  or is a symptom that is  
108 provided by the user;  $\delta_j = 0.75$  if the symptom is frequently associated to the disease  $i$ ; finally, if  
109 the symptom is only occasionally associated to disease  $i$ ,  $\delta_j = 0.5$ . It can be shown that ,

110  $-1 \leq DS_i \leq DS'_i \leq 1$ . However, even though  $DS'_i \neq DS_i$ , the list of diseases is ranked in the  
111 same order by both scores (data not shown). Because more calculations are required to estimate  
112  $DS'_i$ , using this score for ranking leads to slower computation. Hence, we discarded  $DS'_i$ .

113 Second, we also trained and tested algorithms based on Support Vector Machines, Neural  
114 Networks, Bayesian Networks, Random Trees, and Random Forests. Invariably, these algorithms  
115 required extensive training and prediction time, and their best performance was always about one  
116 order of magnitude lower than that of the algorithm and score described in this paper. They were  
117 also orders of magnitude slower in predicting the disease and required more computational  
118 resources for doing so.

#### 119 **RETROSPECTIVE STUDY OF PREVIOUSLY DIAGNOSED RARE DISEASE PATIENTS**

120 RAMEDIS is a server that provides management services for medical doctors diagnosing, treating  
121 and managing rare disease patients. Its database contains short report cards with at most 3  
122 sentences about 1099 patients with confirmed rare disease clinical diagnostics.

123 The information for about 60% of these patients is public, although anonymized. From  
124 these approximately six hundred patients, nearly half have metabolic rare diseases that were  
125 diagnosed in screening programs at a preclinical stage. Of the remainder three hundred patients,  
126 one hundred and eighty seven had a confirmed clinical diagnosis associated with a report card that  
127 described at least one symptom. Examples of the procedure are given

128 We took these 187 patients and reconstructed their symptoms from the individual report  
129 cards. In some cases this is easy, and report cards were very clear (for example: patient with  
130 seizures or hypotonia). In other cases the symptoms were vaguely described and hard to  
131 reconstruct. For example, "hearing problems" or "hearing loss" could be any of the following:  
132 "Conductive deafness/hearing loss", "Central deafness/hearing loss", "Sensorineural

133 deafness/hearing loss”, or “Hearing loss/hypoacusia/deafness”. Another example, “Infection”  
134 could be any of the following: “Immunodeficiency/increased susceptibility to infections/recurrent  
135 infections”, “Recurrent urinary infections”, “Chronic skin infection/ulcerations/ulcers/cancrum”, or  
136 “Repeat respiratory infections”. In these cases, we opted for including all possibilities rather than  
137 eliminating the symptom. This decision was made because eliminating the symptom would have  
138 meant discarding additional patients from an already small set, as all reported symptoms were  
139 often ambiguous. An example of two report cards and their processing is shown in Supporting  
140 Figure 1. The patients, their symptoms, and their clinically confirmed diagnosis can be manually  
141 accessed and compiled from the RAMEDIS website. Supporting Figure 2 plots the accumulated  
142 frequency of the score for the correct (and best) prediction.

#### 143 **BENCHMARKING THE RARE DISEASE DISCOVERY PROTOTYPE**

144 The rare disease prediction algorithm was extensively benchmarked to evaluate the effect of  
145 absent and unrelated symptoms on diagnostic precision. In addition, we also tested how the  
146 changes in the ORPHANET dataset could affect the results. These benchmarks relied on several  
147 sets of tests, all run using Stochastic Monte-Carlo simulations.

#### 148 **Aggregated effects of unreported and unrelated symptoms on prediction accuracy of the Rare** 149 **Disease Discovery Algorithm**

150 The first benchmark test was done by generating several random sets of 10 000 patients, each  
151 with all the symptoms associated to a specific but randomly chosen rare disease. Then, for  
152 increasing percentages of the patients in a given random set either 1, 2, 3, 4, 5, 10, or 20  
153 symptoms were randomly added or deleted to create noise. Then, the noisy sets of symptoms  
154 were used by the RDD algorithm to predict the rare disease that generated them. The precision  $p$ ,

155 sensitivity  $s$ , and  $F$ -Score of the RDD prediction algorithm were calculated for each set of patients.

156 The results are summarized in Figure 2 of the main text and discussed in the main manuscript.

### 157 **Effects of unreported symptoms on prediction accuracy of the Rare Disease Discovery Algorithm**

158 The second benchmark test was done by again generating several random sets of 10 000 patients,

159 each with all the symptoms associated to a specific but randomly chosen rare disease. Then, for

160 increasing percentages of the patients in a given random set, either 25%, 50%, or 75% of the

161 symptoms were deleted to create noise. Finally, the noisy sets of symptoms were used by the RDD

162 algorithm to predict the rare disease that generated them. These simulations represent situations

163 where not all symptoms are known to the user during diagnosis. The precision  $p$ , sensitivity  $s$ , and

164  $F$ -Score of the RDD prediction algorithm were calculated for each set of patients. The results are

165 summarized in Figure 3 of the main text and discussed in the main manuscript.

### 166 **Estimating significance for $DS_i$ scores and testing the performance of RDD in misdiagnosing** 167 **patients that do not suffer from rare diseases**

168 It is important to estimate how large  $DS_i$  must be for a user to be sure that the set of symptoms

169 being submitted to RDD (Rare Disease Discovery) are not the result of randomly associated

170 symptoms. A third benchmark of the RDD algorithm was done to estimate this  $DS_i$  value. This

171 estimation was done in following way. Consider that there are 13 698 diseases and 2 528

172 symptoms in our database. The average number of symptoms associated to a disease is 42, with a

173 standard deviation of 59. To calculate the probability that a given  $DS_i$  for a set of symptoms

174 produced by a user is statistically significant we generated 10 000 random vectors of symptoms.

175 The population of the 10 000 vectors had an average number of symptoms equal to 42, with a

176 standard deviation of 59. Given that these vectors were random, by plotting  $f = (1 -$

177 *Accumulated frequency of  $DS_i$ )* as a function of  $DS_i$  (Supporting Figure 3) we are able to

178 estimate the probability that a given score is achieved simply by choosing a random combination  
179 of symptoms. This experiment estimates that a score  $DS_i \geq 0.5$  has a probability lower than  
180 0.0001 of being obtained by choosing a random set of symptoms. If we lower the probability to  
181 0.01, then  $DS_i \geq 0.25$ . In fact, the median  $DS_i$  score for a random choice of symptoms is less than  
182 0.01.

### 183 **Estimating significance levels for the differences between two $ds_i$ scores**

184 In the previous section we describe an experiment that allowed us to estimate that if  $DS_i > 0.5$ , one  
185 can be 99.99% sure that the score was not obtained by choosing a random set of symptoms.

186 Another issue is that of determining how significant are the differences between two  $DS_i$   
187 scores for the same set of symptoms. Estimating this is much more complicated because the  
188 significance will depend on the number of symptoms one submits for the prediction. A final  
189 benchmark experiment was done in order to provide a best scenario estimation for how  
190 statistically significant the differences between two  $DS_i$  scores are.

191 In this fourth and final benchmark we performed the following Monte Carlo simulation  
192 experiments. For each disease we created all possible sets of  $k$  symptoms, where  $k=1, 2, 3, 4, 5,$   
193  $10, 20,$  and  $50$  symptoms that are associated to that disease (taking care to eliminate diseases in  
194 the simulation that had less than the simulated number of symptoms). Then, for each  $k$ , we  
195 calculated  $DS_i$  for the correct disease. We call this list  $DS_{i \text{ correct}}$ . In parallel, for each  $k$  and for each  
196 set of symptoms, we calculated  $DS_i$  for all diseases that were not the one from which we had  
197 extracted the set of symptoms. We call this list  $DS_{i \text{ incorrect}}$ .

198 Then, for each  $k$  we created a list  $\Delta DS_i$ , where each element of the list corresponds is  
199 obtained by subtracting quantile  $j$  of  $DS_{i \text{ incorrect}}$  from quantile  $j$  of  $DS_{i \text{ correct}}$ . The results are  
200 presented in Supporting Table 2 and interpreted in the following way. For the same number of



201 submitted symptoms, in the context of the disease-symptoms association matrix, the differences  
202 between corresponding quantiles of the  $DS_i$  correct and  $DS_i$  incorrect lists provide a proxy to evaluate  
203 how different two  $DS_i$  scores (one correct and one incorrect) must be for that difference to be  
204 significant. Thus, if users submit for example one symptom and want a certainty of 99.9% that two  
205  $DS_i$  scores are different, Supporting Table 2 tells us that the two scores should differ by at least  
206 0.14. How can this be interpreted? For example, the difference between the score for the most  
207 highly ranked disease and that for the second best guess by RDD needs to differ by at least 0.14, if  
208 one want to state that the prediction is significantly ( $p < 0.001$ ) better than the second best guess.  
209 It is important to benchmark the performance of RDD with patients that have symptom(s)  
210 associated to rare diseases, without suffering from those diseases. This is a very real scenario, as  
211 many of the symptoms are common between rare and non-rare diseases. A possible test would be  
212 to create synthetic patients from other diseases, adding random rare disease symptoms and  
213 running RDD. However, we note that RDD only allows users to choose symptoms that have been  
214 previously associated to at least one rare disease. Hence, testing RDD's performance with  
215 synthetic patients from non-rare diseases is formally equivalent to generating synthetic patients  
216 with random associations of rare-disease symptoms. This is the same test that was done to  
217 determine significance for  $DS_i$  scores. In other words, only when  $DS_i$  is larger than 0.5, does RDD  
218 ensure that the patient has a rare disease, with a probability higher than 0.9999.

### 219 **Accurate predictions in the absence of statistically significant $DS_i$ scores**

220 Taken together, the four benchmark experiments described in the main manuscript show that  $DS_i$   
221 decreases sharply with noise; however, even if  $DS_i$  is below the statistically significant level, it can  
222 still be used to accurately predict the correct rare disease, although with a lower confidence (see  
223 above). For example, in Supporting Figure 4 we show Box plots of the maximum  $DS_i$  scores for all  
224 patients in the second benchmark test. We see that when patients have 50% absent symptoms,

225 the maximum score is still almost always above 0.5, which is the 0.0001 significance level  
226 determined in benchmark 3. Only when 75% of the symptoms are absent do we get maximum  $DS_i$   
227 scores that are equal to or lower than 0.5 for more than 50% of the patients.

228

229 **Effect of evolving datasets: ORPHANET dataset of December 2014 vs. ORPHANET dataset of**  
230 **December 2015**

231 Given that the dataset we used is annotated by humans and evolves, we wanted to have an  
232 estimate of how much the changes might affect the predictive capabilities of RDD. To achieve this  
233 we repeated the tests described in all the previous subsections of “BENCHMARKING THE RARE  
234 DISEASE DISCOVERY ALGORITHM” for the ORPHANET dataset of 2015. What we found was that  
235 the difference in F-Score of RDD between the two sets was smaller than 3% when noise was large  
236 (20 noisy symptoms) and less than 0.2% when symptoms were accurate (Supporting Figure 5). We  
237 also observe that the median score of the correct prediction when 25%, 50%, or 75% of symptoms  
238 are absent increased by approximately 20% when we changed the 2014 dataset for the 2015  
239 dataset (Supporting Figure 6). These results suggest that the human curation of the ORPHANET  
240 dataset is improving over time, which also improves the quality of the results of computer assisted  
241 DDX tools that use them, as is the case of RDD.

| Patient case report   Main data |                                                                                      |
|---------------------------------|--------------------------------------------------------------------------------------|
| Patient ID                      | 101                                                                                  |
| Diagnosis                       | PHENYLKETONURIA (MIM 261600)                                                         |
| Gender                          | m                                                                                    |
| Age of symptoms onset           |                                                                                      |
| Age of diagnosis                | 5 Day(s)                                                                             |
| Found in newborn screening      | y                                                                                    |
| Diagnosis confirmed             | y                                                                                    |
| Country                         | Germany                                                                              |
| Ethnic origin                   | Mother: German, Father: German                                                       |
| History                         | Increased phe in newborn-screening. Early start of phe-restricted dietary treatment. |

| Patient case report   Main data |                                                                                                                                                                                                                                                                                                                                                     |
|---------------------------------|-----------------------------------------------------------------------------------------------------------------------------------------------------------------------------------------------------------------------------------------------------------------------------------------------------------------------------------------------------|
| Patient ID                      | 762                                                                                                                                                                                                                                                                                                                                                 |
| Diagnosis                       | ARGININOSUCCINIC ACIDURIA (MIM 207900)                                                                                                                                                                                                                                                                                                              |
| Gender                          | f                                                                                                                                                                                                                                                                                                                                                   |
| Age of symptoms onset           | 2 Day(s)                                                                                                                                                                                                                                                                                                                                            |
| Age of diagnosis                | 3 Day(s)                                                                                                                                                                                                                                                                                                                                            |
| Found in newborn screening      | y                                                                                                                                                                                                                                                                                                                                                   |
| Diagnosis confirmed             | n                                                                                                                                                                                                                                                                                                                                                   |
| Country                         | Germany                                                                                                                                                                                                                                                                                                                                             |
| Ethnic origin                   | Mother: German, Father: German                                                                                                                                                                                                                                                                                                                      |
| History                         | The 4th day of life, the patient was hospitalized with coma and highly increased ammonia levels. In the extended newborn screening program, elevated levels of citrulline and decreased arginine-levels were found. Psychomotor development is normal. Constant hepatopathy with hepatomegaly and increased transaminases and alkaline phosphatase. |

**A** no usable symptoms; discarded report card

**B** symptoms: comma; hyperammonemia; hepatopathy; hepatomegaly; vague: hepatopathy -possible symptoms include "Abnormal hepatic enzymes/transaminases", "Hepatitis/icterus/cholestasis", "Liver/hepatic steatosis", "Acute hepatic failure", "Chronic hepatic failure", "Hepatoblastoma", "Liver/hepatic abscess", "Polycystic liver disease/hepatic cysts", "Intrahepatic biliary tract atresia/obstruction", "Congenital hepatic fibrosis", "Hepatocellular liver disease/hepatic failure", "Hepatitis/icterus/cholestasis"

242

243 **Supporting Figure 1** – Two examples of RAMEDIS report cards. **A:** Example of a report card that  
 244 could not be used, as no symptoms were reported. **B:** Example of a report card that could be used,  
 245 but had vague description of some symptoms.

246

247

248

249

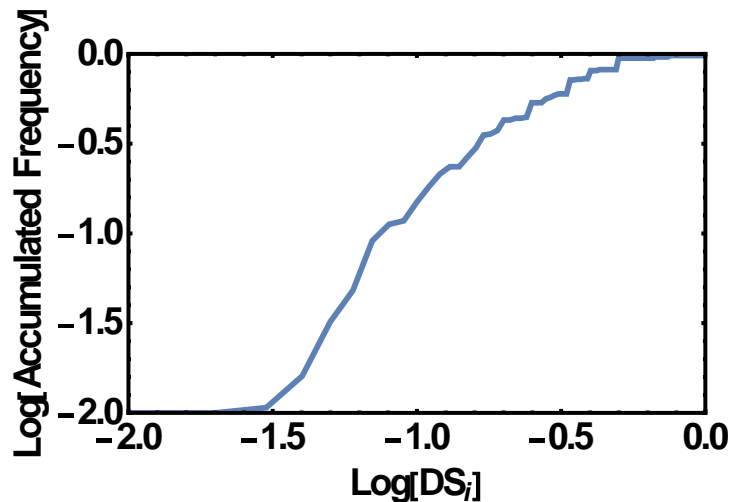

250

251 **Supporting Figure 2** – Cumulative frequency of the highest score for the retrospective study of  
 252 previously diagnosed rare disease patients.

253

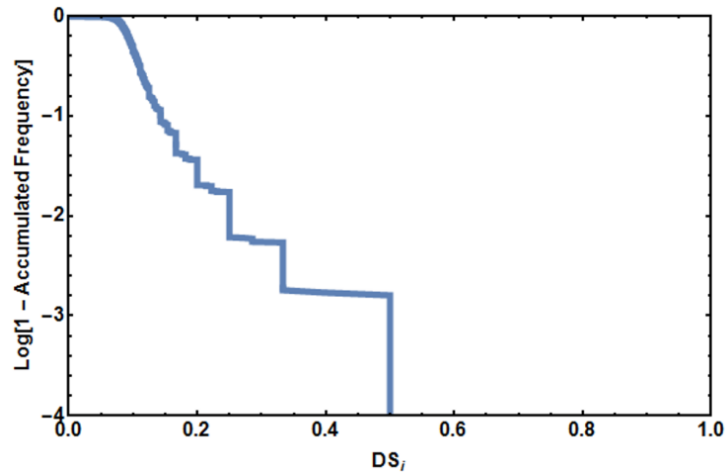

254

255 **Supporting Figure 3** – Estimating the probability that a score  $DS_i \leq k$  might be obtained from a  
 256 random set of symptoms. The score  $DS_i$  is represented in the x-axis, while the logarithm of 1 – the  
 257 accumulated frequency of  $DS_i$  is represented in the y-axis.  $DS_i$  score values higher than 0.5 have a  
 258 probability of 0.0001 of being obtained from a random set of symptoms.

259

260

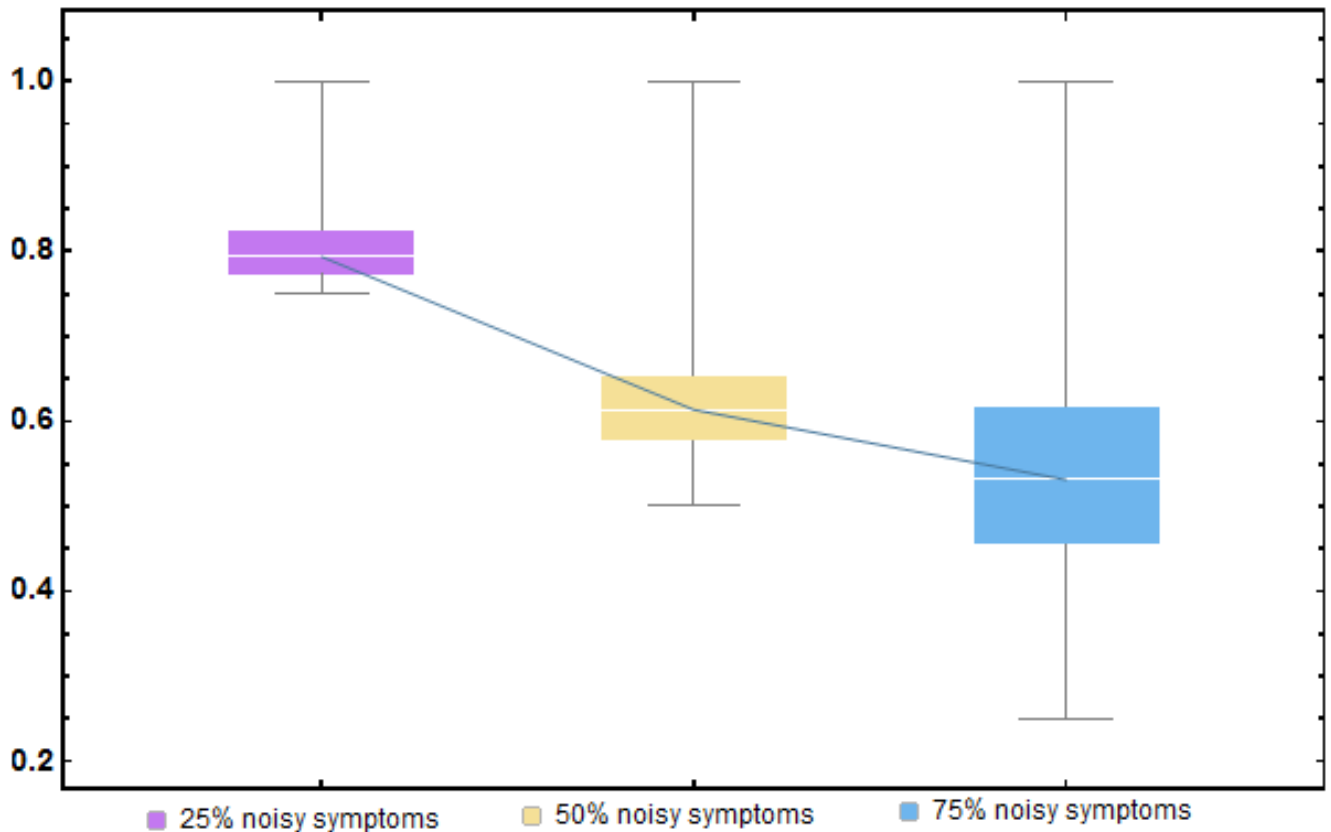

261

262 **Supporting Figure 4** – Effect of unreported symptoms on the maximum  $DS_i$  scores for patients.  
 263 Here we present Box plots of the maximum  $DS_i$  scores for all patients when 25%, 50%, or 75% of  
 264 the symptoms are absent. The median maximum scores are joined by a blue line. The boxes  
 265 indicate the 0.25 and 0.75 quartiles in each dataset.

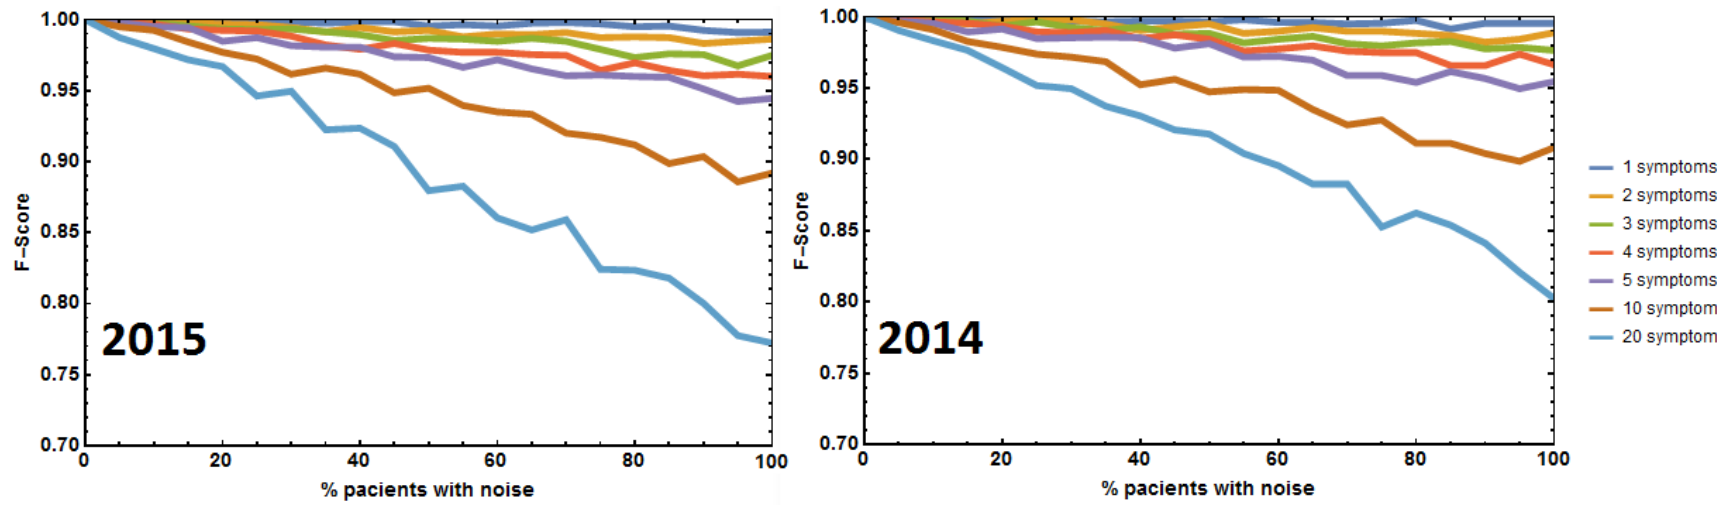

**Supporting Figure 5** – Effect of the evolution in the ORPHANET dataset on the F1-Score of RDD. Comparison of the datasets from December 2014 and 2015. The effect of the dataset from different years is less than 3%.

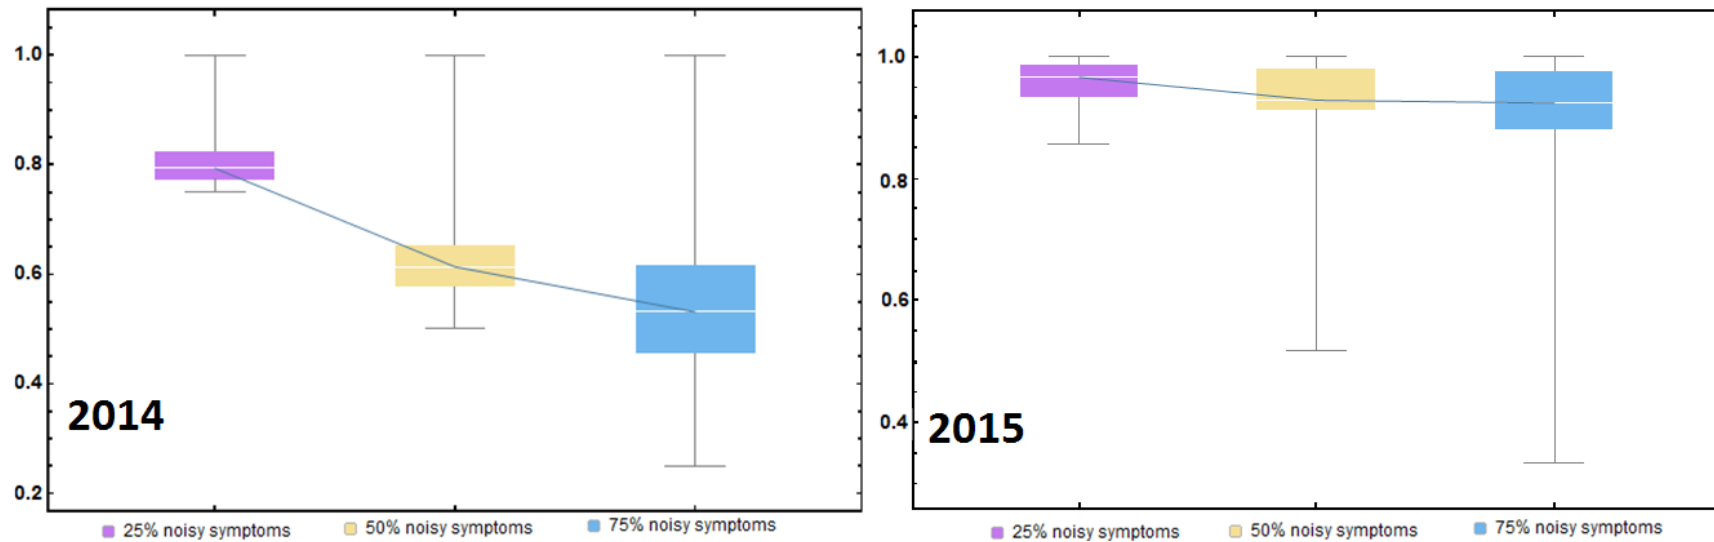

**Supporting Figure 6** – Effect of the evolution in the ORPHANET dataset on the effect of unreported symptoms on the maximum  $DS_i$  scores for patients. Comparison of the datasets from December 2014 and 2015. The median maximum scores are joined by a blue line. The boxes indicate the 0.25 and 0.75 quartiles in each dataset. The median scores of the newest dataset are higher than those of the 2014 dataset, indicating an improvement in the quality of the RDD predictions when symptoms are under-reported.

**Supporting Table 1 – Symptoms used to perform the experiments summarized in Tables 1 and 2.**

| Disease                                                      | Initial Symptom                                           | Rank at First symptom | Additional symptoms required for the appropriate disease to be ranked as 1 <sup>st</sup> prediction                                                                                                                                                                                                                  |
|--------------------------------------------------------------|-----------------------------------------------------------|-----------------------|----------------------------------------------------------------------------------------------------------------------------------------------------------------------------------------------------------------------------------------------------------------------------------------------------------------------|
| <b>Beta-Thalassemia</b>                                      | Chronic skin infection/ulcerations/ulcers/cancrum         | 67 <sup>th</sup>      | Humour troubles/anxiety/depression/apathy/euphoria/irritability<br>Anaemia                                                                                                                                                                                                                                           |
| <b>Canavan Disease</b>                                       | Motor deficit/trouble                                     | 23 <sup>rd</sup>      | Seizures/epilepsy/absences/spasms/status epilepticus<br>Retinitis pigmentosa/retinal pigmentary changes<br>Hypotonia<br>Contractures/cramps/trismus/tetania/claudication/opisthotonos                                                                                                                                |
| <b>Down Syndrome</b>                                         | Strabismus/squint                                         | 244 <sup>th</sup>     | Sterility/hypofertility<br>Microstomia/little mouth<br>Insulin-independent/type 2 diabetes                                                                                                                                                                                                                           |
| <b>Fabry Disease</b>                                         | Renal failure                                             | 111 <sup>th</sup>     | Anorexia<br>Humour troubles/anxiety/depression/apathy/euphoria/irritability<br>Renal disease/nephropathy<br>Nausea/vomiting/regurgitation/mercyism/hyperemesis<br>Myalgia/muscular pain<br>Thick lips<br>X-linked recessive inheritance                                                                              |
| <b>Goldblatt Syndrome</b>                                    | Hip dislocation/dysplasia/coxa valga/coxa vara/coxa plana | 81 <sup>st</sup>      | Delayed dentition/eruption of teeth/lack of eruption of teeth<br>Respiratory distress/dyspnea/respiratory failure/lung volume reduction                                                                                                                                                                              |
| <b>Turner Syndrome</b>                                       | Pigmented naevi/naevus pigmentosus/lentigo                | 21 <sup>st</sup>      | Thin/hypoplastic toe nails                                                                                                                                                                                                                                                                                           |
| <b>Uncombable Hair Syndrome</b>                              | Albinism (hair)                                           | 1 <sup>st</sup>       | Albinism (hair)                                                                                                                                                                                                                                                                                                      |
| <b>Williams Syndrome</b>                                     | Renal failure                                             | 121 <sup>st</sup>     | Angor pectoris/myocardial infarction<br>Thin/hypoplastic toenails<br>Late puberty/hypogonadism/hypogenitalism<br>Osteosclerosis/osteopetrosis/bone condensation                                                                                                                                                      |
| <b>Yunis-Varon Syndrome</b>                                  | Sternal/sternum anomalies                                 | 7 <sup>th</sup>       | Cardiomyopathy/hypertrophic/dilated<br>Poorly ossified skull/calvarium<br>Absent/small toenails/anonychia of feet<br>Blepharophimosis/short palpebral fissures<br>Absent/small fingernails/anonychia of hands<br>Anteverted nares/nostrils<br>Hip dislocation/dysplasia/coxa valga/coxa vara/coxa plana<br>Hypotonia |
| <b>Zellweger-like Syndrome without Peroxisomal Anomalies</b> | High forehead                                             | 31 <sup>st</sup>      | Broad nasal root<br>Expressionless face/amimia                                                                                                                                                                                                                                                                       |

**Supporting Table 2** – Estimating the probability that a difference between scores  $\Delta DS_i < x$  is significant at three p-value levels, when a varying number of symptoms is submitted to RDD.

| Number of symptoms | $\Delta DS_i (p\text{-value} < 0.01)$ | $\Delta DS_i (p\text{-value} < 0.005)$ | $\Delta DS_i (p\text{-value} < 0.001)$ |
|--------------------|---------------------------------------|----------------------------------------|----------------------------------------|
| 1                  | $\Delta DS_i \leq 0.01$               | $\Delta DS_i \leq 0.025$               | $\Delta DS_i \leq 0.14$                |
| 2                  | $\Delta DS_i \leq 0.001$              | $\Delta DS_i \leq 0.005$               | $\Delta DS_i \leq 0.015$               |
| 3                  | $\Delta DS_i \leq 0.001$              | $\Delta DS_i \leq 0.001$               | $\Delta DS_i \leq 0.010$               |
| 4                  | $\Delta DS_i \leq 0.001$              | $\Delta DS_i \leq 0.001$               | $\Delta DS_i \leq 0.007$               |
| 5                  | $\Delta DS_i \leq 0.001$              | $\Delta DS_i \leq 0.001$               | $\Delta DS_i \leq 0.005$               |
| 10                 | $\Delta DS_i \leq 0.001$              | $\Delta DS_i \leq 0.001$               | $\Delta DS_i \leq 0.001$               |
| 20                 | $\Delta DS_i \leq 0.001$              | $\Delta DS_i \leq 0.001$               | $\Delta DS_i \leq 0.001$               |
| 50                 | $\Delta DS_i \leq 0.001$              | $\Delta DS_i \leq 0.001$               | $\Delta DS_i \leq 0.001$               |
